# Supplementary material for: Effect of Heat-Inactivated Clostridium sporogenes and Its Conditioned Media on 3-Dimensional Colorectal Cancer Cell Models
Source: PubMed Central journal article supplement (PMC4623472; doi:10.1038/srep15681), 2015-10-28
Supplement: srep15681-s1.pdf [file srep15681-s1.pdf]

## **Supplementary Information**

### **Effect of Heat-Inactivated *Clostridium sporogenes* and Its Conditioned Media on 3-Dimensional Colorectal Cancer Cell Models.**

**Madhura Satish Bhave, Ammar Hassanbhai, Padmaja Anand, Kathy Qian Luo, Teoh Swee Hin\***

School of Chemical and Biomedical Engineering, Nanyang Technological University, Singapore.

Correspondence and requests for materials should be addressed to T.S.H. (email: teohsh@ntu.edu.sg)

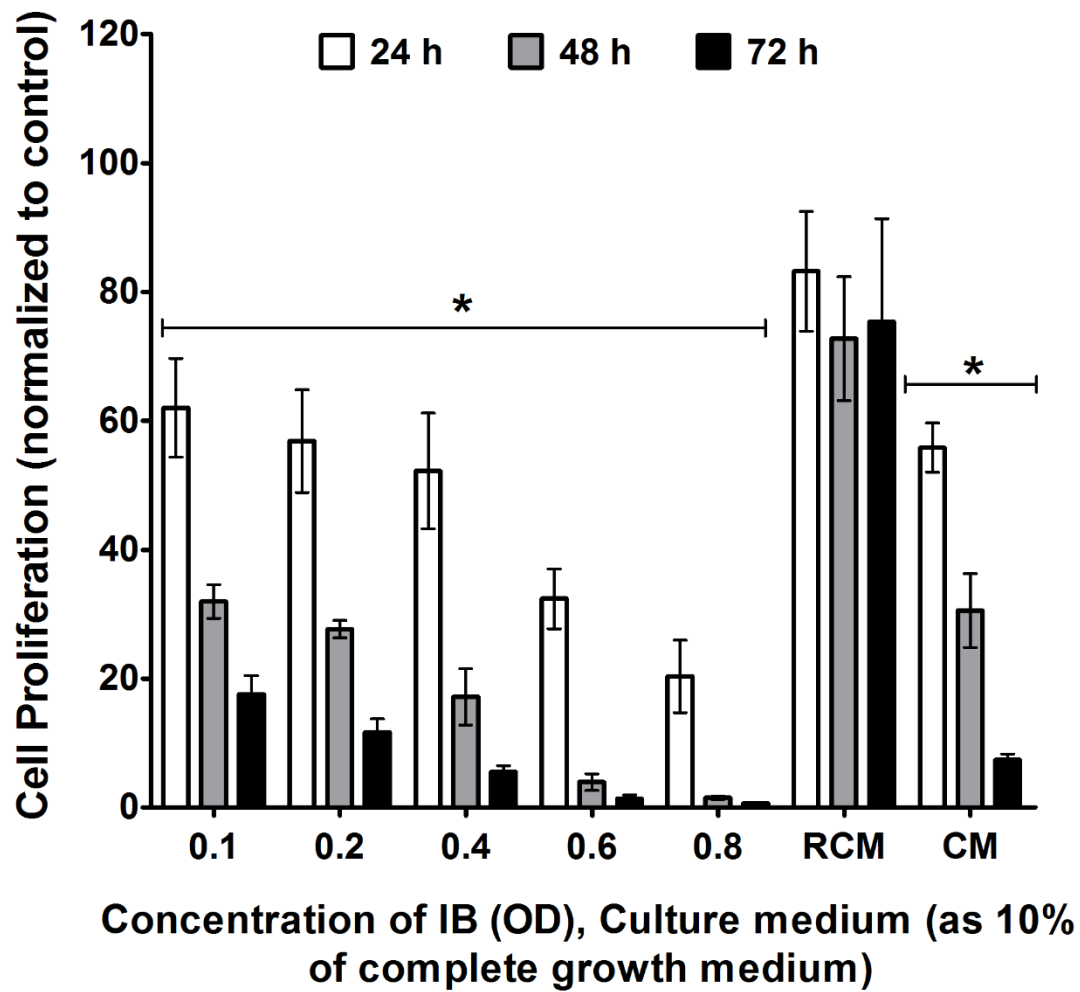

**Supplementary Figure S1. Effect of IB and CM on 2D culture of HCT116 cells.** Cell proliferation with WST-1 assay of 2D cell culture exposed to varying concentrations of inactivated bacteria, 10% of Conditioned Media (CM) of *C. sporogenes* and 10% Reinforced Clostridium Media (RCM). 0.1 OD =  $2.4 \times 10^6$  bacterial cells/ml. *t*-test is a comparison with control. (\*  $p < 0.005$ )

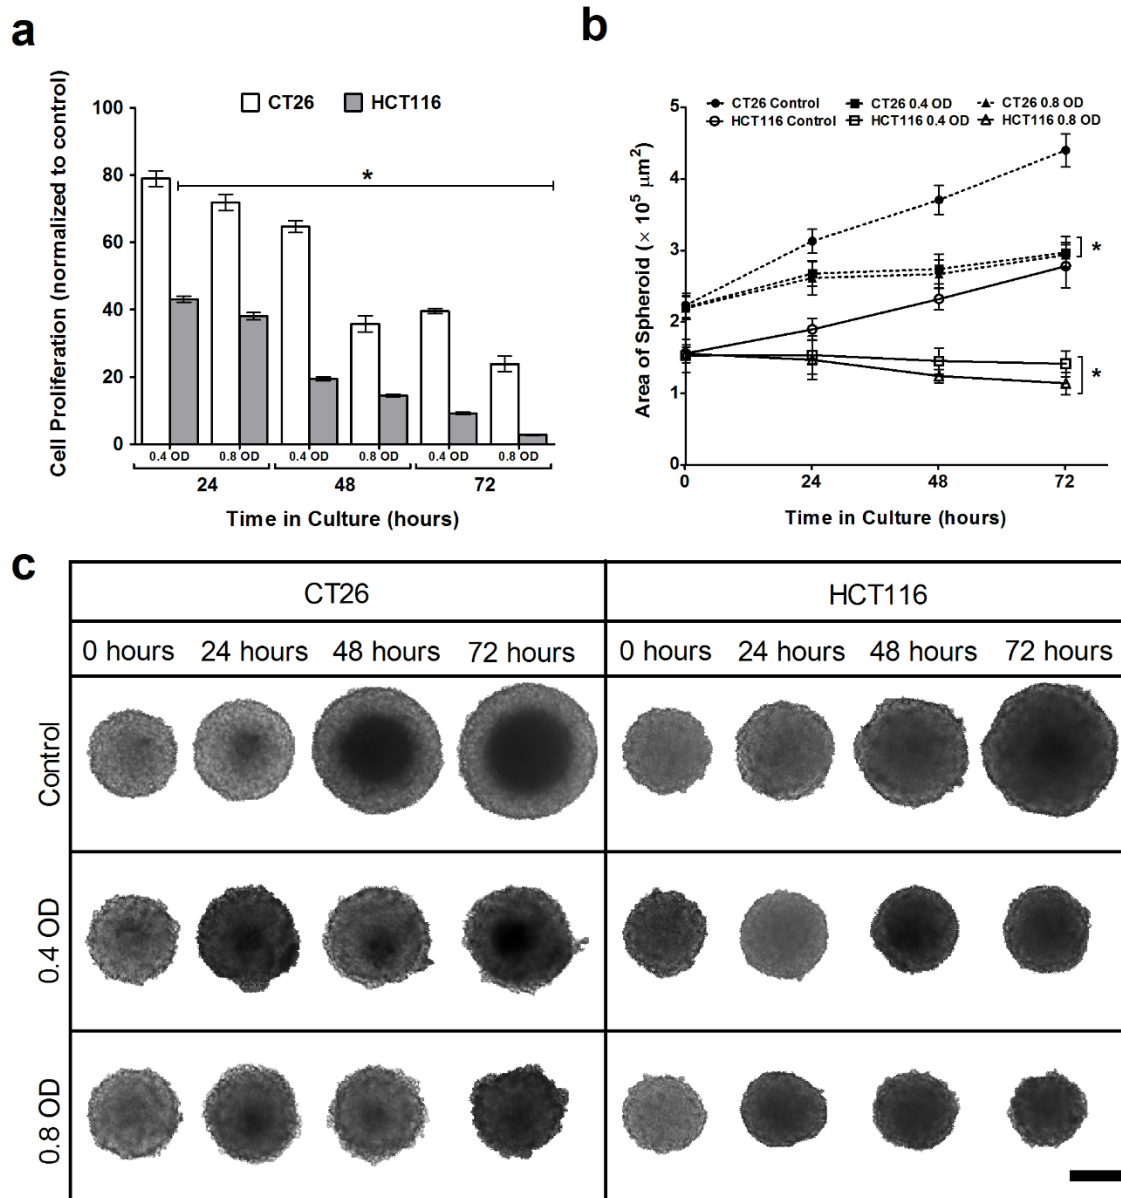

**Supplementary Figure S2. Effect of 0.4 OD and 0.8 OD IB on 3D spheroids.** (a) Cell proliferation with WST-1 assay of CT26 and HCT116 spheroids exposed to 0.4 OD and 0.8 OD concentration of inactivated bacteria over 72 hours.  $0.1 \text{ OD} = 2.4 \times 10^6$  bacterial cells/ml. *t*-test is a comparison with control. (\*  $p < 0.005$ ) (b) Area of 3D spheroids after incubation with 0.4 OD and 0.8 OD of inactivated bacteria, at the 0, 24, 48 and 72 hour time points. The area ( $\mu\text{m}^2$ ) of the spheroids in the images was measured using ImageJ software. *t*-test is a comparison with control (\*  $p < 0.005$ , at all time points). (c) Effect of 0.4 OD and 0.8 OD of inactivated *C. sporogenes* on 3D spheroids, compared with Control. Scale bar represents 1000  $\mu\text{m}$ .
